# Supplementary material for: In Silico Discovery and Subsequent Characterization of Potent 4R-Tauopathy Positron Emission Tomography Radiotracers
Source: PubMed Central journal article supplement — J Med Chem. 2023 Jul 24;66(15):10628–38. doi: 10.1021/acs.jmedchem.3c00775 (PMC10424182; doi:10.1021/acs.jmedchem.3c00775), 2023-07-24
Supplement: jm3c00775_si_002.pdf [file jm3c00775_si_002.pdf]

## Supporting Information

### ***In Silico* Discovery and Subsequent Characterization of Potent 4R-tauopathy Positron Emission Tomography Radiotracers**

Thomas J. A. Graham<sup>a,\*</sup> Anton Lindberg,<sup>b</sup> Junchao Tong,<sup>b</sup> Jeffrey S. Stehouwer,<sup>d</sup> Neil Vasdev,<sup>b,c</sup> Robert H. Mach,<sup>a</sup> and Chester A. Mathis<sup>d</sup>

<sup>a</sup>Department of Radiology, University of Pennsylvania, Philadelphia, Pennsylvania 19104-6323, USA

<sup>b</sup>Azrieli Centre for Neuro-Radiochemistry, Brain Health Imaging Centre, Centre for Addiction and Mental Health, Toronto, ON, M5T 1R8, Canada

<sup>c</sup>Department of Psychiatry, University of Toronto, Toronto, ON, M5T 1R8, Canada

<sup>d</sup>Department of Radiology, University of Pittsburgh, Pittsburgh, PA 15213, USA

\* Corresponding Author: Thomas J. A. Graham, Department of Radiology, University of Pennsylvania, Philadelphia, Pennsylvania 19104-6323, USA; 0000-0002-3733-4106; Phone: +1 267 879 7012; Email: thomas.j.a.graham@gmail.com

#### **Table of Contents:**

|                                                                                             |           |
|---------------------------------------------------------------------------------------------|-----------|
| <i>Purity of compounds delivered by Enamine.....</i>                                        | <i>S1</i> |
| <i>HPLC tracers for radiotracer precursors used in this study.....</i>                      | <i>S3</i> |
| <i>Radio-HPLC traces of isolated radiotracers co-injected with authentic standards.....</i> | <i>S4</i> |
| <i>Tanimoto similarity scores between purchased compounds and 1 or CBD-2114.....</i>        | <i>S5</i> |

#### **Purity of compounds delivered by Enamine:**

| <b>ID</b>   | <b>Paper ID</b> | <b>Formula</b> | <b>MW</b> | <b>HPLC %Purity</b> |
|-------------|-----------------|----------------|-----------|---------------------|
| Z3777013540 | 1               | C17H17FN4O     | 312.341   | 100                 |
| Z5555972024 | 2               | C16H17N5O      | 295.339   | 96                  |
| Z3790652493 | 3               | C16H17N5O      | 295.339   | 100                 |
| Z3347399002 | 4               | C14H15N7O      | 297.315   | 96                  |
| Z4387103711 | 5               | C18H19N3OS     | 325.427   | 94                  |
| Z2739855509 | 6               | C17H17N3O2S    | 327.400   | 100                 |
| Z3831636212 | 7               | C15H15N5OS     | 313.377   | 90                  |
| Z3505917044 | 8               | C16H16N4OS     | 312.389   | 98                  |
| Z2905421604 | 9               | C16H16N4O2     | 296.323   | 95                  |
| Z3831636329 | 10              | C16H17N5O2     | 311.338   | 100                 |
| Z2998207028 | 11              | C18H17FN4O     | 324.352   | 97                  |
| Z3777013334 | 12              | C17H17N5O      | 307.349   | 100                 |

|             |    |            |         |     |
|-------------|----|------------|---------|-----|
| Z3505916830 | 13 | C19H20N4O  | 320.388 | 100 |
| Z5555971761 | 14 | C19H20N4O  | 320.388 | 91  |
| Z2723085787 | 15 | C15H19N5O  | 285.344 | 94  |
| Z2905421695 | 16 | C15H19N5O2 | 301.343 | 100 |
| Z2905421723 | 17 | C15H19N5O  | 285.344 | 96  |
| Z3347398375 | 18 | C15H18N4OS | 302.394 | 100 |
| Z5555972217 | 19 | C17H17N5O  | 307.349 | 100 |
| Z5555971887 | 20 | C17H16FN3O | 297.326 | 95  |
| Z4169252340 | 21 | C16H15FN4O | 298.314 | 98  |

**Table S1:** Details on HPLC purities of compounds delivered by Enamine.

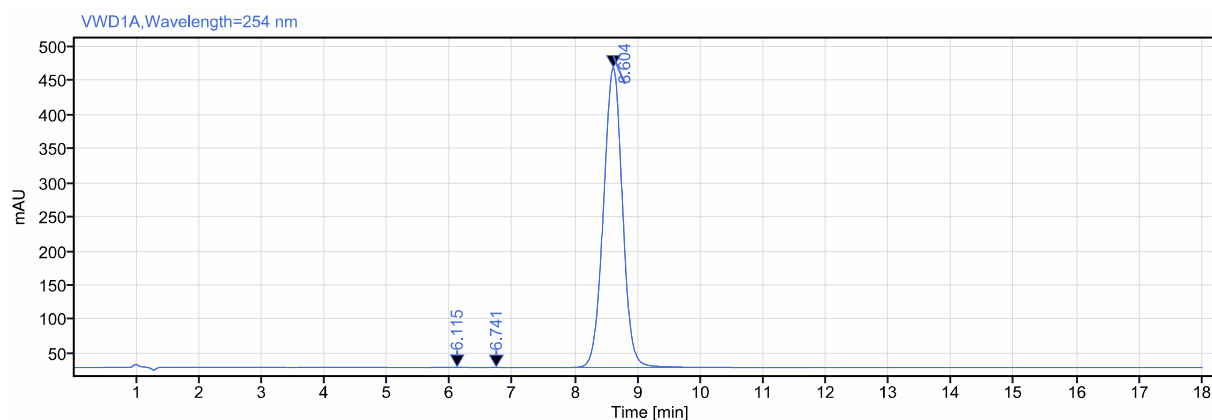

**Figure S1.** HPLC chromatogram of **1** (Z3777013540). Phenomenex Gemini 5 mm, NX-C18, 110 Å, 100 x 4.6 mm; 35:65 v/v CH<sub>3</sub>CN/0.1 M NH<sub>4</sub>HCO<sub>2</sub> pH 4.2; 1 mL/min; 254 nm.

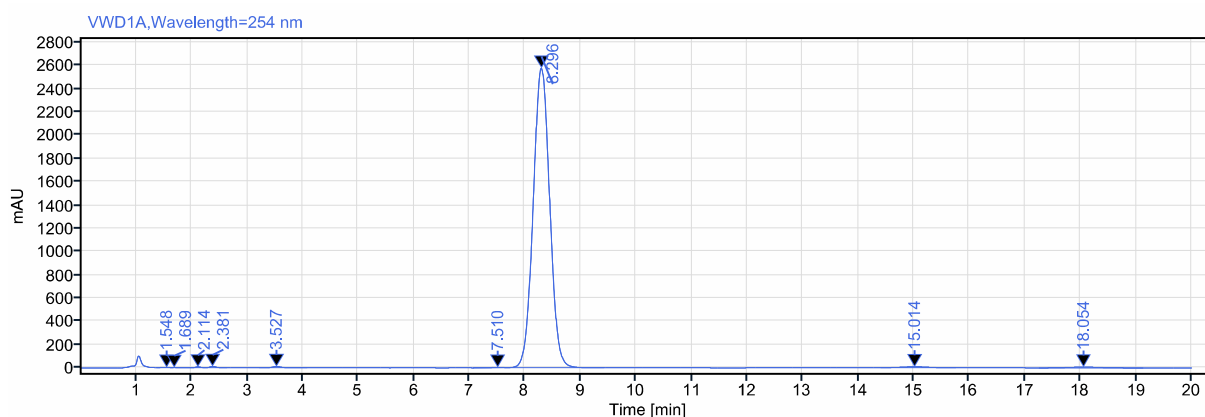

**Figure S2.** HPLC chromatogram of **21** (Z4169252340). Phenomenex Gemini 5 mm, NX-C18, 110 Å, 100 x 4.6 mm; 45:55 v/v CH<sub>3</sub>CN/0.1 M NH<sub>4</sub>HCO<sub>2</sub> pH 4.2; 1 mL/min; 254 nm.

### HPLC Traces for radiotracer precursors used in this study:

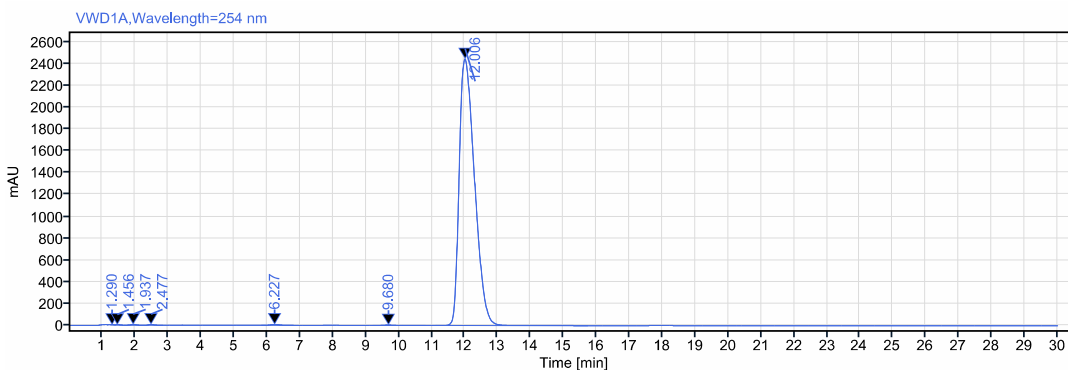

**Figure S3.** HPLC chromatogram of [ $^{18}\text{F}$ ]**1** radiolabeling precursor, *tert*-butyl 2-(2-(4-((*tert*-butoxycarbonyl)oxy)piperidin-1-yl)pyrimidin-5-yl)-6-(4,4,5,5-tetramethyl-1,3,2-dioxaborolan-2-yl)-1*H*-indole-1-carboxylate. Phenomenex Gemini 5 mm, NX-C18, 110 Å, 100 x 4.6 mm; 85:15 v/v  $\text{CH}_3\text{CN}/0.1 \text{ M NH}_4\text{HCO}_2$  pH 4.2; 1 mL/min; 254 nm.

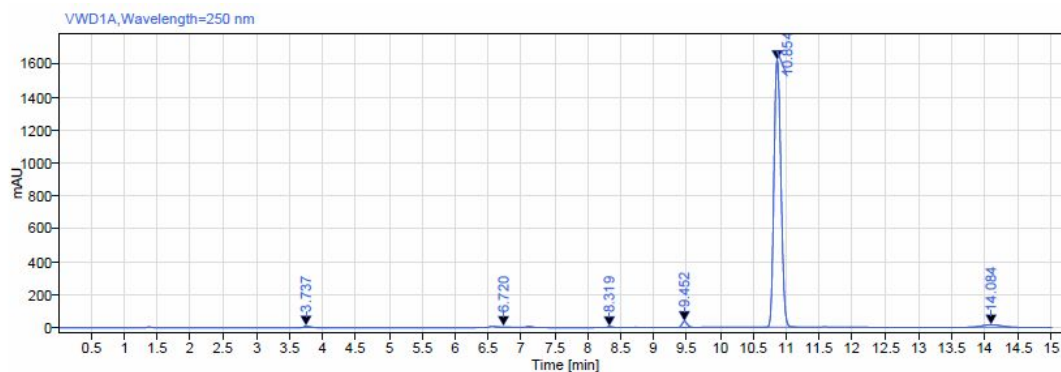

**Figure S4.** HPLC chromatogram of [ $^{18}\text{F}$ ]**21** precursor, *tert*-butyl 2-(2-morpholinopyrimidin-5-yl)-6-(4,4,5,5-tetramethyl-1,3,2-dioxaborolan-2-yl)-1*H*-indole-1-carboxylate. Chemical purity was confirmed by HPLC. Agilent InfinityLab Poroshell 120 PFP, 4.6 x 150 mm, 2.7  $\mu\text{m}$ ) with UV using acetonitrile- $\text{NH}_4\text{CO}_2\text{H}$  (0.05 M) (5–85% gradient over 15 min) at a flow rate of 2 mL/min (4.6 x 150 mm, 3.5  $\mu\text{m}$ ); mobile phase A:  $\text{H}_2\text{O}$  with  $\text{NH}_4\text{CO}_2\text{H}$  (0.05 M); mobile phase B: MeCN; gradient: 5–85% B over 10 min, hold at 85% B for 5 min; flow rate: 2 mL/min; detector wavelength: 254 nm Retention time for *tert*-butyl 2-(2-morpholinopyrimidin-5-yl)-6-(4,4,5,5-tetramethyl-1,3,2-dioxaborolan-2-yl)-1*H*-indole-1-carboxylate (precursor for [ $^{18}\text{F}$ ]**21** radiolabeling) was 10.85 min, and had a purity of 95%.

**Radio-HPLC traces of isolated radiotracers co-injected with authentic standards:**

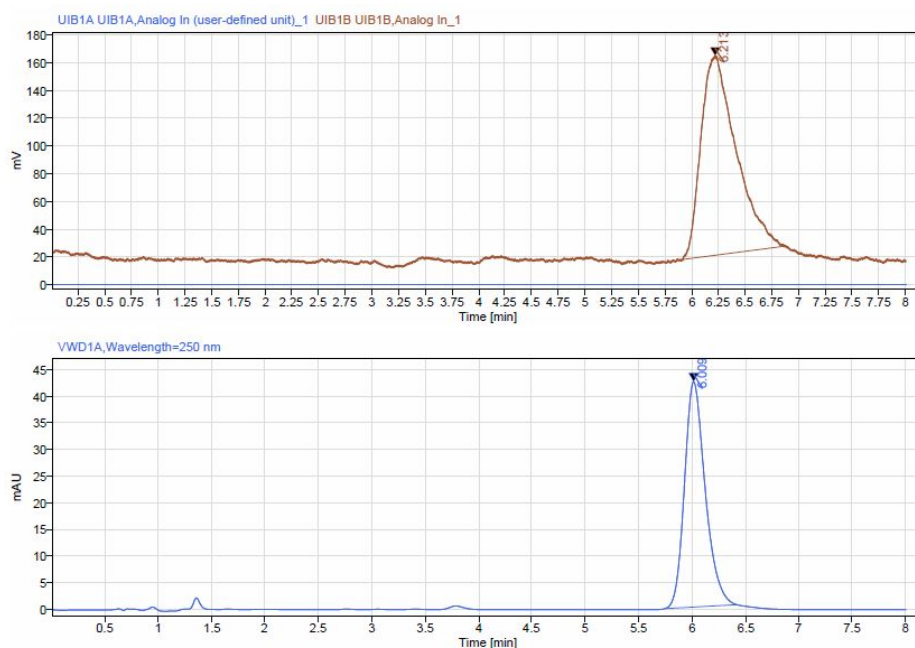

**Figure S5.** Radio-HPLC chromatogram of [ $^{18}\text{F}$ ]**1** co-injected with reference standard **1**. InfinityLab Poroshell 120 PFP, 4.6  $\times$  150 mm, 2.7  $\mu\text{m}$ , Agilent); acetonitrile- $\text{NH}_4\text{CO}_2\text{H}$  (0.05 M) (50/50, v/v) at a flow rate of 2 mL/min.

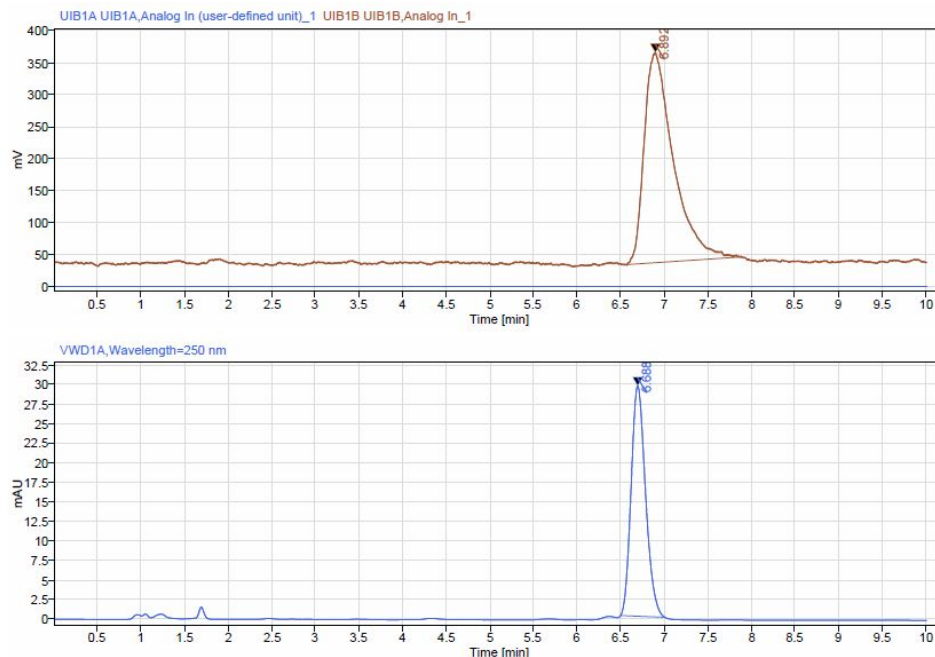

**Figure S6.** Radio-HPLC chromatogram of [ $^{18}\text{F}$ ]**21** co-injected with reference standard **21**. InfinityLab Poroshell 120 PFP, 4.6  $\times$  150 mm, 2.7  $\mu\text{m}$ , Agilent); acetonitrile- $\text{NH}_4\text{CO}_2\text{H}$  (0.05 M) (50/50, v/v) at a flow rate of 2 mL/min.

**Tanimoto similarity scores between purchased compounds and 1 or CBD-2115:**

| ID          | Cpd ID | Tanimoto Similarity Z3540 | Tanimoto Similarity CBD-2115 |
|-------------|--------|---------------------------|------------------------------|
| Z4387103711 | 2      | 0.424                     | 0.154                        |
| Z3347399002 | 3      | 0.414                     | 0.173                        |
| Z2905421723 | 4      | 0.421                     | 0.160                        |
| Z2905421695 | 5      | 0.400                     | 0.154                        |
| Z3505916830 | 6      | 0.491                     | 0.189                        |
| Z3831636212 | 7      | 0.431                     | 0.187                        |
| Z2905421604 | 8      | 0.424                     | 0.169                        |
| Z3347398375 | 9      | 0.414                     | 0.189                        |
| Z3505917044 | 10     | 0.464                     | 0.189                        |
| Z2739855509 | 11     | 0.448                     | 0.200                        |
| Z5555972024 | 12     | 0.714                     | 0.286                        |
| Z2723085787 | 13     | 0.390                     | 0.173                        |
| Z2998207028 | 14     | 0.588                     | 0.225                        |
| Z3790652493 | 15     | 0.615                     | 0.250                        |
| Z3831636329 | 16     | 0.424                     | 0.169                        |

|                    |    |       |       |
|--------------------|----|-------|-------|
| <b>Z3777013334</b> | 17 | 0.439 | 0.189 |
| <b>Z5555971761</b> | 18 | 0.500 | 0.192 |
| <b>Z5555971887</b> | 19 | 0.692 | 0.362 |
| <b>Z5555972217</b> | 20 | 0.458 | 0.227 |
| <b>Z4169252340</b> | 21 | 0.708 | 0.294 |

**Table S2:** Tanimoto similarity scores between purchased compounds from Enamine and **1** or CBD-2115. The similarity scores were calculated using RDKit Morgan fingerprints (1024 bit, radius=2).
